# Supplementary material for: Monocyte-to-macrophage switch reversibly impaired by Ibrutinib
Source: PubMed Central journal article supplement (PMC6443008; doi:10.18632/oncotarget.26744), 2019-03-08
Supplement: oncotarget-10-1943-s001.pdf [file oncotarget-10-1943-s001.pdf]

## Monocyte-to-macrophage switch reversibly impaired by Ibrutinib

### SUPPLEMENTARY MATERIALS

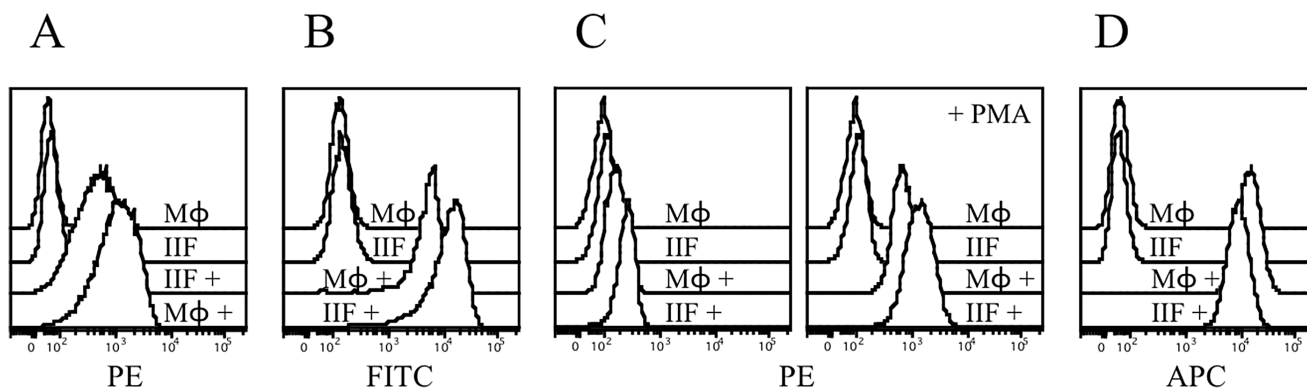

**Supplementary Figure 1: Flow cytometry study of macrophages (Mφ) and Ibrutinib-induced fibrocyte-like cells (IIF).** Cells were evaluated for phagocytosis by pHrodo Red E. Coli BioParticles (A) and pHrodo Green Zymosan A BioParticles (B), ROS production by CellRox Deep Red reagent in the absence or presence of PMA (C), mitochondrial mass by MitoTracker Green FM probe (D). (+): cells incubated with the specific reagent as specified above. Data are representative of at least 3 experiments.

**Supplementary Table 1: Mφ and IIF surface markers analysis**

|        | Mφ           | IIF          |
|--------|--------------|--------------|
| CD14   | 66630 ± 1490 | 70512 ± 2598 |
| CD68   | 126 ± 15     | 120 ± 21     |
| HLA-DR | 18410 ± 510  | 11770 ± 454* |
| CCR7   | negative     | negative     |
| CD206  | 3715 ± 1204  | 3672 ± 1518  |
| CD163  | 470 ± 123    | 516 ± 112    |
| CD200R | 1586 ± 510   | 1641 ± 485   |

\* $p < 0.05$ .

Flow cytometry analysis was performed after 10 days of culture. At least 20,000 cells were acquired on a FACSCantoII cytometer (Becton Dickinson) and analyzed by FlowJo 9.9.6 software (Tree Star). Data are expressed as mean ± SD of Mean Fluorescence Intensity of 4 experiments.
